# Supplementary material for: Unraveling Shikimate Dehydrogenase Inhibition by 6-Nitroquinazoline-2,4-diol and Its Impact on Soybean and Maize Growth
Source: MDPI journal article supplement (doi:10.3390/agronomy14050930), 2024-04-28
Supplement: s1 [file s1]

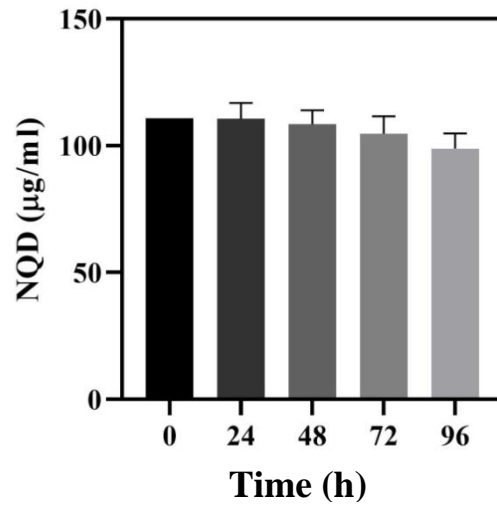

**Figure S1.** In a system without seedlings, the spontaneous degradation of NQD was observed during 96 h of incubation. The results are presented as the mean values  $\pm$  SEM ( $n = 5$ ) and were analyzed by Dunnett's multiple comparison test ( $p \leq 0.05$ ).

**Table S1.** Yield of NQD extraction in soybean and maize roots incubated for 96 h. Mean values (n = 3).

| Sample     | Area (mAU) | Performance (%) |
|------------|------------|-----------------|
| 125 µM NQD | 1853996    |                 |
| Soybean    | 1624525    | 87%             |
| Maize      | 1442945    | 77%             |

**Table S2.** Identification of proteins by mass spectrometry.

| UniProt code | Description                                                                               | Molecular mass (Da) | Score | Coverage (%) |
|--------------|-------------------------------------------------------------------------------------------|---------------------|-------|--------------|
| Q9SQT8       | Bifunctional 3-dehydroquinate desidratase/shikimate dehydrogenase from <i>A. thaliana</i> | 66138               | 13717 | 75.79        |
| A0A119LPF9   | Transmembrane protein <i>A. thaliana</i>                                                  | 12109               | 5708  | 43.65        |

**Table S3.** Biometric parameters of soybean seedlings incubated for 48 h without (control) or with 100  $\mu$ M glyphosate and 100  $\mu$ M glyphosate plus 500  $\mu$ M NQD.

| Soybean          | Length                          | Fresh biomass                   |
|------------------|---------------------------------|---------------------------------|
| Control          | 4.943 $\pm$ 0.4296 <sup>a</sup> | 1.110 $\pm$ 0.0479 <sup>a</sup> |
| Glyphosate       | 2.620 $\pm$ 0.3612 <sup>b</sup> | 0.829 $\pm$ 0.0551 <sup>b</sup> |
| Glyphosate + NQD | 2.097 $\pm$ 0.1260 <sup>b</sup> | 0.814 $\pm$ 0.0474 <sup>b</sup> |

Mean values  $\pm$  SEM (n = 3) followed by different letters are significantly different, as determined by Tukey's multiple comparisons test ( $p \leq 0.05$ ).
